# Supplementary material for: Obesogenic diet induces circuit-specific memory deficits in mice
Source: eLife. 2024 Mar 4;13:e80388. doi: 10.7554/eLife.80388 (PMC10911750; doi:10.7554/eLife.80388)
Supplement: Figure 2—figure supplement 1—source data 1. [file elife-80388-fig2-figsupp1-data1.xlsx]

## Sheet: Figure 2-figure supplement 1
CA3 : number of c-Fos+ cell/mm² (A)								NAc : number of c-Fos+ cells/mm² (B)				mPFC : number of c-Fos+ cells/mm² (C)
CD mCh Nac	CD mCh mPFC	CD Gi Nac	CD Gi mPFC	HFD mCh Nac	HFD mCh mPFC	HFD Gi Nac	HFD Gi mPFC	CD mCh Nac	CD Gi Nac	HFD mCh Nac	HFD Gi Nac	CD mCh mPFC	CD Gi mPFC	HFD mCh mPFC	HFD Gi mPFC
9.61959	8.95441	9.18489	7.8624	35.8568	49.8242	30.3346	76.8113	3.45387	3.03219	18.6747	2.83428	16.9602	3.8338	15.4127	25.4788
24.9445	16.5303	7.37941	4.81739	12.3253	15.5907	20.4968	34.1744	3.41853	1.79561	5.16846	6.71008	4.03935	1.94292	36.3357	27.883
14.9478	8.11642	3.49506	4.85076	13.1395	28.7146	12.639	42.8126	3.30393	0.75477	6.90593	2.4512	15.0287	8.39853	10.0343	10.5405
14.1224	13.7123	11.5088	21.1836	55.2631	16.8521	47.6958	25.7223	4.93508	1.3084	18.2003	3.99762	16.2581	3.24236	39.3851	18.545
9.67947	11.7965	14.6457	10.7131	24.926	41.8259	35.3599	3.99896	2.90458	0.819124	5.50852	3.9351	6.75674	7.36795	70.5451	19.4249
7.94162	27.5683	14.3208	5.42133	40.5653	37.202	19.7464	14.404	7.69357	0.681663	2.25267	3.33078	12.9876	13.0742	25.6823	17.0163
12.6465		18.1453	25.9239		44.7825	17.5066	23.4041		2.26204		3.79804		23.8291		34.5867
		14.8662	22.1591										7.66252
			25.9742										7.6507
