# Supplementary material for: Obesogenic diet induces circuit-specific memory deficits in mice
Source: eLife. 2024 Mar 4;13:e80388. doi: 10.7554/eLife.80388 (PMC10911750; doi:10.7554/eLife.80388)
Supplement: Figure 2—source data 1. [file elife-80388-fig2-data1.xlsx]

## Sheet: Figure 2C-D
CA1 : number of c-Fos+ cells/mm² (Figure 2C)								CA1 : mCherry+ cells expressing c-Fos (Figure 2D)
CD mCh Nac	CD mCh mPFC	CD Gi Nac	CD Gi mPFC	HFD mCh Nac	HFD mCh mPFC	HFD Gi Nac	HFD Gi mPFC	CD mCh Nac	CD mCh mPFC	CD Gi Nac	CD Gi mPFC	HFD mCh Nac	HFD mCh mPFC	HFD Gi Nac	HFD Gi mPFC
29.1899	35.9589	42.302	33.2096	77.3897	45.9088	63.9198	21.0148	6.55738	15.8333	8.82353	7.22222	15.8416	15.2542	8.69565	11.2033
25.6538	19.5648	35.3045	16.4138	100.927	52.6553	23.1236	44.4975	10.6383	9.30233	9.25758	7.38636	19.0332	29.5652	11.8483	16.9492
20.3799	26.2167	17.8371	21.9036	40.9474	55.5482	25.4651	25.7961	6.92641	9.83607	9.33333	7.3125	12.426	15.9091	4.22535	7.00637
31.8127	85.3962	29.8385	24.0908	46.578	34.3361	58.3263	25.8373	5.55556	7.88462	7.7789	4.10526	24.2188	12.5	9.30233	1.88679
65.2486	35.9052	29.2048	18.7716	40.6904	115.585	43.7671	42.7322	10.0882	9.11494	5.8885	7.64706	16.4286	17.9245	7.85714	18.1818
30.8683	32.1622	43.7807	14.6024	44.4723	56.9849	25.6265	23.4329	14.7479	8.89474	7.87474	6.96429	7.48663	16.4706	12.2951	9.09091
		28.3268	24.5573	46.9525	61.277	15.0226	45.5329			6.32875	7.44792		16.1905	12.7389	12.4352
		24.707	27.9848		55.5422	19.1907				9.11215	7.8125
			30.9915								9.28571
33.8589	39.2007	31.4127	23.6139	56.851	59.7297	34.3052	32.692	9.08562	10.1443	8.04969	7.24265	15.9058	17.6877	9.56611	10.9648	mean
6.50449	9.59007	3.08461	2.12835	8.77681	8.50491	6.57692	4.14526	1.40229	1.16756	0.473789	0.451097	2.3249	2.07509	1.14428	2.13646	sem
