# Supplementary material for: Obesogenic diet induces circuit-specific memory deficits in mice
Source: eLife. 2024 Mar 4;13:e80388. doi: 10.7554/eLife.80388 (PMC10911750; doi:10.7554/eLife.80388)
Supplement: Figure 3—figure supplement 1—source data 1. [file elife-80388-fig3-figsupp1-data1.xlsx]

## Sheet: Figure 3-figure supplement 1
Time spent in open arms (s)								Time spent in closed arms (s)								% Time spent in open arms (B)
CD mCh Nac	CD mCh mPFC	CD Gi Nac	CD Gi mPFC	HFD mCh Nac	HFD mCh mPFC	HFD Gi Nac	HFD Gi mPFC	CD mCh Nac	CD mCh mPFC	CD Gi Nac	CD Gi mPFC	HFD mCh Nac	HFD mCh mPFC	HFD Gi Nac	HFD Gi mPFC	CD mCh Nac	CD mCh mPFC	CD Gi Nac	CD Gi mPFC	HFD mCh Nac	HFD mCh mPFC	HFD Gi Nac	HFD Gi mPFC
131.62	62.87	136.178	156.279	188.06	132.44	64.5	114.94	419.12	512.56	408.94	352.69	331.62	405.37	215.06	419	23.8988	10.9257	24.9813	30.705	36.1877	24.6258	23.072	21.5268
170.87	88.19	128.815	75.9959	127.19	156.56	110.75	152.62	349.31	462.19	405.44	472.69	420.75	340.56	448.37	399.75	32.8482	16.0235	24.1112	13.8505	23.2124	31.4934	19.8079	27.63
104.25	54.37	63.3621	21.8587	153.19	87.25	113.37	117.94	386.31	435.37	448.12	534.62	347.25	408.75	439.25	413.75	21.2512	11.1018	12.3879	3.92804	30.6111	17.5907	20.515	22.1821
74.37	109.153	61.9388	41.2925	108.62	61.19	199.94	102.81	398.62	401.56	454.56	533.94	394.56	468.62	329.12	430.75	15.7234	21.3727	11.9921	7.17841	21.5867	11.5494	37.7916	19.2687
69.4066	148.038	194.057	106.306			174.94	186.25	490.19	423.75	389.75	431.19			370.19	321	12.403	25.8904	33.24	19.7781			32.0914	36.7176
60.7264	100.156	148.038	230.834			137.75	66.62	476.81	485.12	421.31	364.56			288.62	431.87	11.2972	17.1127	26.0013	38.77			32.3076	13.3644
82.7959		127.392	245.998			170.62	44.44	498.87		433.19	326.75			312.75	470.56	14.2343		22.7249	42.9505			35.298	8.62913
		163.413	108.169			121.19	120.37			393.63	453.75			354.19	319.56			29.3358	19.2499			25.4933	27.3612
						161.19	96.06							310.69	394.31							34.1591	19.5893
						98.12	75.69							340.37	378							22.3768	16.6832
Number of entries in open arms								Number of entries in closed arms (s)								% of entries in open arms (C)
CD mCh Nac	CD mCh mPFC	CD Gi Nac	Cd Gi mPFC	HFD mCh Nac	HFD mCh mPFC	HFD Gi Nac	HFD Gi mPFC	CD mCh Nac	CD mCh mPFC	CD Gi Nac	CD Gi mPFC	HFD mCh Nac	HFD mCh mPFC	HFD Gi Nac	HFD Gi mPFC	CD mCh Nac	CD mCh mPFC	CD Gi Nac	CD Gi mPFC	HFD mCh Nac	HFD mCh mPFC	HFD Gi Nac	HFD Gi mPFC
48	51	15	24	41	13	22	44	80	61	28	42	59	30	35	67	37.5	45.5357	34.8837	36.3636	41	30.2326	38.5965	39.6396
87	31	13	15	56	9	49	64	98	42	27	37	52	32	58	67	47.027	42.4658	32.5	28.8462	51.8519	21.9512	45.7944	48.855
8	8	10	4	12	98	50	49	26	30	41	15	35	50	113	62	23.5294	21.0526	19.6078	21.0526	25.5319	66.2162	30.6748	44.1441
4	22	11	33	10	6	105	33	24	43	39	31	28	13	90	87	14.2857	33.8462	22	51.5625	26.3158	31.5789	53.8462	27.5
10	18	25	7			86	94	35	37	51	14			61	85	22.2222	32.7273	32.8947	33.3333			58.5034	52.514
13	14	22	18			17	6	23	26	46	40			27	19	36.1111	35	32.3529	31.0345			38.6364	24
12		21	35			16	7	30		39	47			20	21	28.5714		35	42.6829			44.4444	25
		17	20			12	10			30	23			21	25			36.1702	46.5116			36.3636	28.5714
						7	12							27	26							20.5882	31.5789
						3	8							25	35							10.7143	18.6047
