# Supplementary material for: Obesogenic diet induces circuit-specific memory deficits in mice
Source: eLife. 2024 Mar 4;13:e80388. doi: 10.7554/eLife.80388 (PMC10911750; doi:10.7554/eLife.80388)
Supplement: Figure 3—source data 1. [file elife-80388-fig3-data1.xlsx]

## Sheet: Figure 3A-B
Group		Test ORM (A)				Test OLM (B)
		Novel object (s)	Familiar Object (s)	% explo novel	% explo familiar	Novel object	Familiar Object	% explo novel test	% explo familiar test
CD mCh Nac	1	13.0739	6.92607	65.3696	34.6304	13.9085	6.09147	69.5427	30.4573
CD mCh Nac	2	14.0961	5.90391	70.4804	29.5196	12.5238	7.47619	62.6191	37.3809
CD mCh Nac	3	11.2628	8.73724	56.3138	43.6862	11.5759	8.42412	57.8794	42.1206
CD mCh Nac	4	11.0045	8.9955	55.0225	44.9775	10.9493	9.05066	54.7467	45.2533
CD mCh Nac	5	10.5	9.5	52.5	47.5	13.4	6.6	67	33
CD mCh Nac	6	11.0526	8.94737	55.2632	44.7368	12.4665	7.53348	62.3326	37.6674
CD mCh Nac	7	9.72973	10.2703	48.6486	51.3514	8.75	11.25	43.75	56.25
CD mCh mPFC	1	11.8005	8.19952	59.0024	40.9976	10.637	9.36296	53.1852	46.8148
CD mCh mPFC	2	13.2555	6.74453	66.2774	33.7226	10.8809	9.11907	54.4046	45.5954
CD mCh mPFC	3	12.1459	7.85406	60.7297	39.2703	12.8565	7.14355	64.2823	35.7177
CD mCh mPFC	4	12.3335	7.66651	61.6675	38.3325	11.1779	8.8221	55.8895	44.1105
CD mCh mPFC	5	13	7	65	35	10	10	50	50
CD mCh mPFC	6	10.7862	9.21382	53.9309	46.0691	11.2171	8.78289	56.0855	43.9145
CD mCh mPFC	7	12.6	7.4	63	37	11	9	55	45
CD Gi NAC	1	12	8	60	40	8.5	11.5	42.5	57.5
CD Gi NAC	2	12.4	7.6	62	38	11.289	8.71099	56.445	43.555
CD Gi NAC	3	9.2	10.8	46	54	11.0969	8.90313	55.4843	44.5157
CD Gi NAC	4	8	12	40	60	8.8	11.2	44	56
CD Gi NAC	5	8.8	11.2	44	56	10.6	9.4	53	47
CD Gi NAC	6	12	8	60	40	11.2	8.8	56	44
CD Gi NAC	7	10.7	9.3	53.5	46.5	13.2	6.8	66	34
CD Gi NAC	8	13.5	6.5	67.5	32.5	9.8	10.2	49	51
CD Gi mPFC	1	9.1	10.9	45.5	54.5	13.0021	6.99793	65.0104	34.9896
CD Gi mPFC	2	11.3	8.7	56.5	43.5	12	8	60	40
CD Gi mPFC	3	8.4	11.6	42	58	12.4352	7.56477	62.1762	37.8238
CD Gi mPFC	4	13	7	65	35	11.1042	8.89583	55.5208	44.4792
CD Gi mPFC	5	12.5	7.5	62.5	37.5	10.3	9.7	51.5	48.5
CD Gi mPFC	6	8.3	11.7	41.5	58.5	11.3	8.7	56.5	43.5
CD Gi mPFC	7	13.6	6.4	68	32	11.5	8.5	57.5	42.5
CD Gi mPFC	8	11.6	8.4	58	42	12.3467	7.6533	61.7335	38.2665
HFD mCh Nac	1	10.9237	9.07634	54.6183	45.3817	10.744	9.25604	53.7198	46.2802
HFD mCh Nac	2	9.53317	10.4668	47.6658	52.3342	9.28435	10.7156	46.4218	53.5782
HFD mCh Nac	3	9.57869	10.4213	47.8935	52.1065	10.572	9.42801	52.86	47.14
HFD mCh Nac	4	9.59093	10.4091	47.9547	52.0453	9.08913	10.9109	45.4456	54.5544
HFD mCh Nac	5	11.1344	8.8656	55.672	44.328	10.0194	9.98058	50.0971	49.9029
HFD mCh Nac	6	10.5651	9.43486	52.8257	47.1743	10.5012	9.49876	52.5062	47.4938
HFD mCh mPFC	1	12.4	7.6	62	38	11.0521	8.94789	55.2606	44.7394
HFD mCh mPFC	2	10.6794	9.32057	53.3971	46.6029	7.36038	12.6396	36.8019	63.1981
HFD mCh mPFC	3	7.40228	12.5977	37.0114	62.9886	10.3335	9.66651	51.6675	48.3325
HFD mCh mPFC	4	9.67835	10.3217	48.3917	51.6083	9.54137	10.4586	47.7069	52.2931
HFD mCh mPFC	5	11.0151	8.98494	55.0753	44.9247	10.54	10.46	50.1905	49.8095
HFD mCh mPFC	6	10.3147	9.68535	51.5733	48.4267	10.27	9.97	50.7411	49.2589
HFD Gi Nac	1	12.7957	7.2043	63.9785	36.0215	9.32153	10.6785	46.6077	53.3923
HFD Gi Nac	2	12.0753	7.92472	60.3764	39.6236	10.3859	9.61407	51.9297	48.0703
HFD Gi Nac	3	11.7524	8.24762	58.7619	41.2381	7.8452	12.1548	39.226	60.774
HFD Gi Nac	4	13.8936	6.10641	69.4679	30.5321	9.56824	10.4318	47.8412	52.1588
HFD Gi Nac	5	12.426	7.57402	62.1299	37.8701	8.84086	11.1591	44.2043	55.7957
HFD Gi Nac	6	11.2767	8.7233	56.3835	43.6165	8.01187	11.9881	40.0593	59.9407
HFD Gi Nac	7	12.6818	7.31825	63.4088	36.5912	9.22622	10.7738	46.1311	53.8689
HFD Gi Nac	8	10.8863	9.11369	54.4316	45.5684	7.69003	12.31	38.4501	61.5499
HFD Gi Nac	9	14.0457	5.95427	70.2286	29.7714	10.3	9.69995	51.5002	48.4998
HFD Gi Nac	10	13.9893	6.01066	69.9467	30.0533	11.8619	8.13807	59.3097	40.6903
HFD Gi Nac	11	10.9179	9.08213	54.5894	45.4106	11.4061	8.5939	57.0305	42.9695
HFD Gi Nac	12	10.9725	9.0275	54.8625	45.1375	11.277	8.72299	56.3851	43.6149
HFD Gi mPFC	1	12.5269	7.47307	62.6347	37.3653	12.9882	7.01183	64.9408	35.0592
HFD Gi mPFC	2	10.8491	9.1509	54.2455	45.7545	11.7602	8.23977	58.8011	41.1989
HFD Gi mPFC	3	12.8252	7.17476	64.1262	35.8738	9.61896	10.381	48.0948	51.9052
HFD Gi mPFC	4	12.2457	7.75432	61.2284	38.7716	10.9763	9.02367	54.8817	45.1183
HFD Gi mPFC	5	13.0762	6.92381	65.381	34.619	12.3499	7.65012	61.7494	38.2506
HFD Gi mPFC	6	9.75134	10.2487	48.7567	51.2433	12.4191	7.58088	62.0956	37.9044
HFD Gi mPFC	7	13.8552	6.14476	69.2762	30.7238	12.3181	7.68193	61.5904	38.4096
HFD Gi mPFC	8	11.3278	8.67224	56.6388	43.3612	12.5811	7.4189	62.9055	37.0945
HFD Gi mPFC	9	8.19103	11.809	40.9551	59.0449	13.6765	6.32353	68.3824	31.6176
HFD Gi mPFC	10	7.91893	12.0811	39.5947	60.4053	13.0736	6.92645	65.3678	34.6322
HFD Gi mPFC	11	8.67704	11.323	43.3852	56.6148	10.3895	9.61052	51.9474	48.0526
