# Supplementary material for: Obesogenic diet induces circuit-specific memory deficits in mice
Source: eLife. 2024 Mar 4;13:e80388. doi: 10.7554/eLife.80388 (PMC10911750; doi:10.7554/eLife.80388)
Supplement: Table 1—source data 1. [file elife-80388-table1-data1.xlsx]

## Sheet: Table 1 BW and fat mass 
Body Weight								%Fat mass
CD mCherry vHPC-NAc	CD mCherry vHPC-mPFC	CD Gi vHPC-Nac	CD Gi vHPC-mPFC	HFD mCherry vHPC-mPFC	HFD mCherry vHPC-Nac	HFD Gi vHPC-Nac	HFD Gi vHPC-mPFC	CD mCherry vHPC-NAc	CD mCherry vHPC-mPFC	CD Gi vHPC-Nac	CD Gi vHPC-mPFC	HFD mCherry vHPC-mPFC	HFD mCherry vHPC-Nac	HFD Gi vHPC-Nac	HFD Gi vHPC-mPFC
28.2	27	29.7	29.3	34	33	30.9	33.1	11.1028	9.83333	13.4882	8.07509	32.35	17.3545	15.1283	17.5933
30.5	30.6	31.2	31.3	28	31.2	29.3	32	3.18361	5.96405	13.5577	7.83706	19.1571	7.82051	27.7622	10.4846
30.4	31.5	30.4	28.8	31.4	34.45	40.1	31.6	6.91	3.11429	5.82566	17.4062	28.7006	33.2279	34.6509	23.2546
30.4	29.2	30.4	32.7	27.8	33.1	30.7	32.6	5.82566	3.25342	3.11429	18.0612	17.8417	28.7523	3.59386	14.9082
30.6	34	29.2	29.4	30.6	34.8	34.3	32.4	5.95425	12.95	11.4213	6.86395	3.45098	36.9741	6.77346	10.3562
29	27.65	34.2	30.6	27.2	28.5	33.2	35.9	8.83103	11.4213	12.1787	8.83103	11.6103	5.51228	13.2645	18.7402
26.3	30.5	30.5	29	31.7	33	37.8	36.1	12.1787	3.3541	12.95	5.95425	9.03785	10.3212	7.32468	4.97125
		28.5	34	32.5		31	40.5			5.72632	3.3541	11.9385		4.83577	6
			27.65			30.8	31.3				2.34228			22.6032	5.93291
						31	30.6							9.68072	37.2346
						30.4	31.3							21.3429	28.7091
						29.46	30.29							27.2257	23.1448
						32.2	35.5							22.3344	31.1353
						30.2	31.7							26.972	40.1114
						28.8	39							26.3985	39.7051
						28	35.9							25.4243	31.0252
						28.9	37.7							10.8131	36.8282
						30.8	29.7							33.8127	28.2238
						34.6	30							34.0925	25.67
						33.1	33.5							28.0877	35.1672
						28.9	29.2							24.4464	21.5411
						32.6	31.8							26.9325	21.2642
29.3429	30.0643	30.5125	30.3056	30.4	32.5786	31.6845	33.2586	7.7123	7.12722	9.78278	8.74724	16.7609	19.9947	20.6136	23.2728	mean
0.614064	0.89965	0.605462	0.680198	0.874847	0.810633	0.632699	0.667152	1.20019	1.5914	1.48215	1.84267	3.48228	4.87611	2.1163	2.3948	sem
