# Supplementary material for: Obesogenic diet induces circuit-specific memory deficits in mice
Source: eLife. 2024 Mar 4;13:e80388. doi: 10.7554/eLife.80388 (PMC10911750; doi:10.7554/eLife.80388)
Supplement: Table 2—source data 1. [file elife-80388-table2-data1.xlsx]

## Sheet: Table 2 training fos
Group	Animal	Time object 1 (s)	Time object 2 (s)	Total time O1+O2	number of mCherry cells
CD mCherry vHPC-NAc	1	23.4	17.16	40.56	237
CD mCherry vHPC-NAc	2	20.02	21.58	41.6	119
CD mCherry vHPC-NAc	3	12.8	28.96	41.76	62
CD mCherry vHPC-NAc	4	22	18.4	40.4	376
CD mCherry vHPC-NAc	5	30.61	24.75	55.36	231
CD mCherry vHPC-NAc	6	31.96	22.91	54.87	36
CD mCherry vHPC-PFC	1	18.68	23.08	41.76	156
CD mCherry vHPC-PFC	2	19.54	21.46	41	201
CD mCherry vHPC-PFC	3	21	20.52	41.52	55
CD mCherry vHPC-PFC	4	17.44	23.48	40.92	240
CD mCherry vHPC-PFC	5	23.6	17.3	40.9	43
CD mCherry vHPC-PFC	6	24.89	25.78	50.67	122
CD Gi vHPC-Nac	1	13.92	26.54	40.46	78
CD Gi vHPC-Nac	2	10.94	30.28	41.22	234
CD Gi vHPC-Nac	3	21.02	19.68	40.7	69
CD Gi vHPC-Nac	4	25.76	14.78	40.54	174
CD Gi vHPC-Nac	5	22.1	19.64	41.74	102
CD Gi vHPC-Nac	6	23.62	17.34	40.96	172
CD Gi vHPC-Nac	7	18.3	20	38.3	309
CD Gi vHPC-Nac	8	11.91	8.95	20.86	190
CD Gi vHPC-PFC	1	16.7	24.16	40.86	54
CD Gi vHPC-PFC	2	19.18	21.32	40.5	131
CD Gi vHPC-PFC	3	21.8	18.26	40.06	119
CD Gi vHPC-PFC	4	19.06	21.48	40.54	142
CD Gi vHPC-PFC	5	16.08	33.32	49.4	76
CD Gi vHPC-PFC	6	28.12	13.84	41.96	42
CD Gi vHPC-PFC	7	29.13	29.84	58.97	143
CD Gi vHPC-PFC	8	14.69	15.94	30.63	310
CD Gi vHPC-PFC	9	16.8	20.8	37.6	136
HFD Gi saline	1	28.63	20.46	49.09	212
HFD Gi saline	2	25.69	20.85	46.54	128
HFD Gi saline	3	20.83	19.17	40	78
HFD Gi saline	4	32.3	24.75	57.05	170
HFD Gi saline	5	22.33	23.84	46.17	105
HFD Gi saline	6	24.49	20.87	45.36	140
HFD Gi saline	7	12.98	18.1	31.08	202
HFD Gi saline	8	15.78	15.97	31.75	187
HFD mCherry	1	21.49	24.23	45.72	303
HFD mCherry	2	25.51	26.82	52.33	118
HFD mCherry	3	20.03	12.87	32.9	21
HFD mCherry	4	27.93	27.92	55.85	230
HFD mCherry	5	27.7	28.19	55.89	331
HFD mCherry	6	21.08	17.38	38.46	176
HFD mCherry	7	20.04	19.94	39.98	104
HFD mCherry	8	21.22	20.55	41.77	169
HFD Gi vHPC-Nac	1	24.31	28.36	52.67	230
HFD Gi vHPC-Nac	2	17.09	19.35	36.44	211
HFD Gi vHPC-Nac	3	17.13	15.85	32.98	142
HFD Gi vHPC-Nac	4	25.68	25.53	51.21	86
HFD Gi vHPC-Nac	5	27.62	13.86	41.48	140
HFD Gi vHPC-Nac	6	23.84	24.5	48.34	122
HFD Gi vHPC-Nac	7	10.06	12.69	22.75	157
HFD Gi vHPC-mPFC	1	32.9	27.11	60.01	241
HFD Gi vHPC-mPFC	2	26.09	20.69	46.78	118
HFD Gi vHPC-mPFC	3	27.27	24.07	51.34	157
HFD Gi vHPC-mPFC	4	20.56	17.6	38.16	53
HFD Gi vHPC-mPFC	5	24.3	21.26	45.56	33
HFD Gi vHPC-mPFC	6	16.01	25.25	41.26	44
HFD Gi vHPC-mPFC	7	14.89	18.99	33.88	193
