# Supplementary material for: Obesogenic diet induces circuit-specific memory deficits in mice
Source: eLife. 2024 Mar 4;13:e80388. doi: 10.7554/eLife.80388 (PMC10911750; doi:10.7554/eLife.80388)
Supplement: Table 3—source data 1. [file elife-80388-table3-data1.xlsx]

## Sheet: Table 3
Group	Animal	Training				Test
		Time object 1 (s)	Time object 2 (s)	Time to reach criterion (s)	% explo novel training	Time to reach criterion (s)
CD mCh Nac	1	8.85277	11.1472	380	44.2639	350
CD mCh Nac	2	9.93131	10.0687	436	49.6565	322
CD mCh Nac	3	11.8987	8.10127	392	59.4937	600
CD mCh Nac	4	8.98364	11.0164	295	44.9182	305
CD mCh Nac	5	8.5	11.5	461	42.5	540
CD mCh Nac	6	12.2	7.8	581	61	330
CD mCh Nac	7	11.3	8.7	256	56.5	360
CD mCh mPFC	1	10.2557	9.74433	516	51.2783	430
CD mCh mPFC	2	11.6996	8.3004	248	58.498	160
CD mCh mPFC	3	11.0253	8.97474	495	55.1263	382
CD mCh mPFC	4	10.6314	9.36858	342	53.1571	412
CD mCh mPFC	5	8	12	267	40	240
CD mCh mPFC	6	10	10	275	50	180
CD mCh mPFC	7	9.6	10.4	277	48	240
CD Gi NAC	1	11.2	8.8	251	56	380
CD Gi NAC	2	13	7	240	65	445
CD Gi NAC	3	12	8	459	60	280
CD Gi NAC	4	5.7	14.3	240	28.5	326
CD Gi NAC	5	9.3	10.3	260	47.449	230
CD Gi NAC	6	10.5	9.5	282	52.5	256
CD Gi NAC	7	9	11	283	45	253
CD Gi NAC	8	6.9	13.1	270	34.5	270
CD Gi mPFC	1	10.4	9.7	250	51.7413	240
CD Gi mPFC	2	10	10	170	50	134
CD Gi mPFC	3	8	12	200	40	180
CD Gi mPFC	4	10	10	400	50	280
CD Gi mPFC	5	11	9	392	55	600
CD Gi mPFC	6	12	8	282	60	469
CD Gi mPFC	7	9.2	10.8	387	46	230
CD Gi mPFC	8	10	10	260	50	240
HFD mCh Nac	1	11.3766	8.6234	161	56.883	150
HFD mCh Nac	2	11.2961	8.70388	317	56.4806	296
HFD mCh Nac	3	11.9507	8.04926	343	59.7537	199
HFD mCh Nac	4	10.7157	9.28433	402	53.5783	403
HFD mCh Nac	5	9.4	10.6	600	47	600
HFD mCh Nac	6	9.9	10.1	551	49.5	600
HFD mCh mPFC	1	9.15187	10.8481	358	45.7594	330
HFD mCh mPFC	2	10.9526	9.04738	224	54.7631	157
HFD mCh mPFC	3	9.98526	10.0147	234	49.9263	224
HFD mCh mPFC	4	9.30439	10.6956	156	46.522	353
HFD mCh mPFC	5	4.6	15.4	600	23	600
HFD mCh mPFC	6	11.1	8.9	600	55.5	398
HFD Gi Nac	1	12.8933	7.1067	390	64.4665	288
HFD Gi Nac	2	10.0347	9.96526	258	50.1737	164
HFD Gi Nac	3	10.9708	9.02917	375	54.8541	172
HFD Gi Nac	4	9.49386	10.5061	327	47.4693	183
HFD Gi Nac	5	6.49952	13.5005	172	32.4976	121
HFD Gi Nac	6	9.04004	10.96	541	45.2002	297
HFD Gi Nac	7	10.1501	9.84988	377	50.7506	351
HFD Gi Nac	8	8.99402	11.006	177	44.9701	146
HFD Gi Nac	9	8.21146	11.7885	176	41.0573	241
HFD Gi Nac	10	8.33658	11.6634	257	41.6829	290
HFD Gi Nac	11	9.79228	10.2077	205	48.9614	262
HFD Gi Nac	12	13.0935	6.90655	327	65.4673	234
HFD Gi mPFC	1	9.69578	10.3042	344	48.4789	158
HFD Gi mPFC	2	9.13485	10.8652	315	45.6742	294
HFD Gi mPFC	3	9.1482	10.8518	201	45.741	206
HFD Gi mPFC	4	8.15159	11.8484	600	40.7579	419
HFD Gi mPFC	5	13.4241	6.57588	288	67.1206	196
HFD Gi mPFC	6	11.7847	8.21527	285	58.9236	381
HFD Gi mPFC	7	11.0281	8.97187	249	55.1406	291
HFD Gi mPFC	8	9.53642	10.4636	201	47.6821	201
HFD Gi mPFC	9	9.11779	10.8822	351	45.589	382
HFD Gi mPFC	10	10.664	9.33596	305	53.3202	315
HFD Gi mPFC	11	10.1887	9.81132	176	50.9434	300
