# Supplementary material for: Obesogenic diet induces circuit-specific memory deficits in mice
Source: eLife. 2024 Mar 4;13:e80388. doi: 10.7554/eLife.80388 (PMC10911750; doi:10.7554/eLife.80388)
Supplement: Table 4—source data 1. [file elife-80388-table4-data1.xlsx]

## Sheet: Table 4
Group	Animal	Training				Test
		Time object 1 (s)	Time object 2 (s)	Time to reach criterion (s)	% explo novel training	Time to reach criterion (s)
CD mCh Nac	1	9.49781	10.5022	391	47.489	233
CD mCh Nac	2	9.25123	10.7488	224	46.2562	293
CD mCh Nac	3	8.43597	11.564	519	42.1799	565
CD mCh Nac	4	9.39853	10.6015	176	46.9927	362
CD mCh Nac	5	9.5	10.5	387	47.5	300
CD mCh Nac	6	9	11	600	45	600
CD mCh Nac	7	8	12	437	40	502
CD mCh mPFC	1	9.84427	10.1557	467	49.2213	320
CD mCh mPFC	2	8.91262	11.0874	131	44.5631	225
CD mCh mPFC	3	8.24219	11.7578	394	41.2109	479
CD mCh mPFC	4	11.043	8.95699	243	55.215	299
CD mCh mPFC	5	9.7	10.3	210	48.5	342
CD mCh mPFC	6	8.6	11.4	253	43	266
CD mCh mPFC	7	11	9	257	55	360
CD Gi NAC	1	10.2	9.8	443	51	330
CD Gi NAC	2	9.45	10.5	570	47.3684	510
CD Gi NAC	3	9.3	10.7	234	46.5	207
CD Gi NAC	4	7.4	12.6	360	37	270
CD Gi NAC	5	9.2	10.8	230	46	398
CD Gi NAC	6	10	10	300	50	540
CD Gi NAC	7	9.6	10.4	360	48	255
CD Gi NAC	8	10.1	9.9	300	50.5	240
CD Gi mPFC	1	11.5	8.5	515	57.5	300
CD Gi mPFC	2	7.5	12.5	323	37.5	420
CD Gi mPFC	3	11	9	600	55	600
CD Gi mPFC	4	8.8	11.2	280	44	360
CD Gi mPFC	5	9.7	10.3	154	48.5	180
CD Gi mPFC	6	12	8	290	60	240
CD Gi mPFC	7	10	10	203	50	360
CD Gi mPFC	8	10.5	9.5	163	52.5	269
HFD mCh Nac	1	10.2059	9.79412	314	51.0294	144
HFD mCh Nac	2	9.87763	10.1224	282	49.3882	399
HFD mCh Nac	3	10.0743	9.92571	374	50.3715	205
HFD mCh Nac	4	10.2184	9.78158	469	51.0921	488
HFD mCh Nac	5	9.34	11.54	371	44.7318	279
HFD mCh Nac	6	9.77	10.73	300	47.6585	241
HFD mCh mPFC	1	10.0249	9.97509	309	50.1246	480
HFD mCh mPFC	2	10.1541	9.84586	247	50.7707	250
HFD mCh mPFC	3	7.64848	12.3515	447	38.2424	248
HFD mCh mPFC	4	10.0048	9.99515	199	50.0242	216
HFD mCh mPFC	5	10.5	10.26	309	50.578	349
HFD mCh mPFC	6	8.72	11.74	456	42.6197	437
HFD Gi Nac	1	9.43809	10.5619	432	47.1905	435
HFD Gi Nac	2	9.41935	10.5806	178	47.0968	252
HFD Gi Nac	3	11.1143	8.88569	237	55.5716	305
HFD Gi Nac	4	9.82261	10.1774	437	49.113	440
HFD Gi Nac	5	8.90873	11.0913	212	44.5437	174
HFD Gi Nac	6	8.95661	11.0434	600	44.7831	491
HFD Gi Nac	7	10.2068	9.79317	223	51.0342	340
HFD Gi Nac	8	9.75255	10.2475	252	48.7627	346
HFD Gi Nac	9	11.9276	8.07241	414	59.638	205
HFD Gi Nac	10	10.9951	9.00488	386	54.9756	358
HFD Gi Nac	11	11.5996	8.40039	446	57.998	306
HFD Gi Nac	12	9.38542	10.6146	273	46.9271	403
HFD Gi mPFC	1	9.40188	10.5981	305	47.0094	274
HFD Gi mPFC	2	10.3229	9.6771	347	51.6145	212
HFD Gi mPFC	3	9.96574	10.0343	339	49.8287	600
HFD Gi mPFC	4	7.00288	12.9971	525	35.0144	438
HFD Gi mPFC	5	9.84019	10.1598	355	49.201	307
HFD Gi mPFC	6	10.1513	9.84871	391	50.7565	289
HFD Gi mPFC	7	10.005	9.99504	297	50.0248	232
HFD Gi mPFC	8	10.5853	9.41468	195	52.9266	421
HFD Gi mPFC	9	11.0956	8.90438	399	55.4781	243
HFD Gi mPFC	10	7.68395	12.316	380	38.4198	461
HFD Gi mPFC	11	8.90625	11.0938	409	44.5312	259
